# Supplementary material for: Glucose transporter 10 modulates adipogenesis via an ascorbic acid-mediated pathway to protect mice against diet-induced metabolic dysregulation
Source: PubMed Central journal article supplement (PMC7274451; doi:10.1371/journal.pgen.1008823), 2020-05-26
Supplement: pgen.1008823.s002.pdf [file pgen.1008823.s002.pdf]

**S1 Table. SNPs in *SLC2A10* region associated with BMI, glucose tolerance, insulin resistance or T2D-related phenotypes in independent human populations and studies**

| SNP        | Phenotype                                                                   | P-value | Study and dataset                                                         |
|------------|-----------------------------------------------------------------------------|---------|---------------------------------------------------------------------------|
| rs1073137  | Fasting insulin-related: homeostatic model assessment of insulin resistance | 0.0035  | GWAS of glyceimic traits (HGVST463)                                       |
| rs3091433  | Fasting insulin-related: homeostatic model assessment of insulin resistance | 0.0030  | GWAS of glyceimic traits (HGVST463)                                       |
| rs4809599  | Fasting glucose-related: homeostatic model assessment of beta-cell function | 0.0397  | GWAS of glyceimic traits (HGVST463)                                       |
| rs11086177 | Fasting glucose-related: homeostatic model assessment of beta-cell function | 0.0293  | GWAS of glyceimic traits (HGVST463)                                       |
| rs4239646  | Fasting glucose-related: homeostatic model assessment of beta-cell function | 0.0412  | GWAS of glyceimic traits (HGVST463)                                       |
| rs4810546  | Fasting glucose-related: homeostatic model assessment of beta-cell function | 0.0407  | GWAS of glyceimic traits (HGVST463)                                       |
| rs6018026  | Fasting glucose-related: homeostatic model assessment of beta-cell function | 0.0432  | GWAS of glyceimic traits (HGVST463)                                       |
| rs6124859  | Fasting glucose-related: homeostatic model assessment of beta-cell function | 0.0490  | GWAS of glyceimic traits (HGVST463)                                       |
| rs13038390 | Fasting glucose-related: fasting plasma glucose                             | 0.0157  | GWAS of glyceimic traits (HGVST463)                                       |
| rs8119705  | Fasting glucose-related: fasting plasma glucose                             | 0.0138  | GWAS of glyceimic traits (HGVST463)                                       |
| rs11550540 | Fasting glucose-related: fasting plasma glucose                             | 0.0092  | GWAS of glyceimic traits (HGVST463)                                       |
| rs13044870 | Fasting glucose-related: fasting plasma glucose                             | 0.0098  | GWAS of glyceimic traits (HGVST463)                                       |
| rs2143044  | Fasting glucose-related: fasting plasma glucose                             | 0.0474  | GWAS of glyceimic traits (HGVST463)                                       |
| rs3091619  | Fasting glucose-related: fasting plasma glucose                             | 0.0150  | GWAS of glyceimic traits (HGVST463)                                       |
| rs4810537  | Fasting glucose-related: fasting plasma glucose                             | 0.0088  | GWAS of glyceimic traits (HGVST463)                                       |
| rs971759   | Fasting glucose-related: fasting plasma glucose                             | 0.0103  | GWAS of glyceimic traits (HGVST463)                                       |
| rs12479748 | Fasting glucose-related: fasting plasma glucose                             | 0.0501  | GWAS of glyceimic traits (HGVST463)                                       |
| rs2425903  | Fasting glucose-related: fasting plasma glucose                             | 0.0445  | GWAS of glyceimic traits (HGVST463)                                       |
| rs6017999  | Fasting glucose-related: fasting plasma glucose                             | 0.0416  | GWAS of glyceimic traits (HGVST463)                                       |
| rs6018020  | Fasting glucose-related: fasting plasma glucose                             | 0.0380  | GWAS of glyceimic traits (HGVST463)                                       |
| rs6090546  | Fasting glucose-related: fasting plasma glucose                             | 0.0488  | GWAS of glyceimic traits (HGVST463)                                       |
| rs2694899  | Type II diabetes                                                            | 0.0020  | GWAS of type II diabetes mellitus (HGVST5)                                |
| rs6018037  | Two-hour glucose challenge                                                  | 0.0494  | GWAS of glucose levels 2 hours after an oral glucose challenge (HGVST433) |
| rs6094461  | Two-hour glucose challenge                                                  | 0.0384  | GWAS of glucose levels 2 hours after an oral glucose challenge (HGVST433) |
| rs4810537  | Body mass index                                                             | 0.0246  | GWAS of adult body mass index in a British population (HGVST308)          |
| rs998422   | Body mass index                                                             | 0.0106  | GWAS of adult body mass index in a British population (HGVST308)          |
| rs3091619  | Body mass index                                                             | 0.0432  | GWAS of adult body mass index in a British population (HGVST308)          |
| rs998422   | Body mass index                                                             | 0.0170  | GWAS of adult body mass index in a British population (HGVST308)          |
| rs3092706  | Body mass index                                                             | 0.0136  | GWAS of adult body mass index in a British population (HGVST308)          |
| rs2425902  | Body mass index                                                             | 0.0490  | GWAS of adult body mass index in a British population (HGVST308)          |
| rs2425908  | Body mass index                                                             | 0.0155  | GWAS of adult body mass index in a British population (HGVST308)          |

Data were analyzed using GWAS Central database.
